# Supplementary material
Source: PubMed Central journal article supplement (PMC9912245)
Supplement: NEJMra2206346_disclosures.pdf [file NEJMra2206346_disclosures.pdf]

Cecilia Garlanda

**Discloser Identifier:** 909177 **Disclosure Purpose:** Review - Humoral Innate Immunity and Acute Phase Proteins at the time of COVID-19

## Summary of Interests

### Intellectual Property

| Type                                                                                                                                                                                                          | Is Licensed                           | Interest Held By |      |               |                                       |            |  |  |
|---------------------------------------------------------------------------------------------------------------------------------------------------------------------------------------------------------------|---------------------------------------|------------------|------|---------------|---------------------------------------|------------|--|--|
| Other Intellectual Property - Royalties related to the sale of reagents (monoclonal antibodies) to various companies                                                                                          | -                                     | Self             |      |               |                                       |            |  |  |
| <i>Description:</i> Royalties related to the sale of reagents (monoclonal, polyclonal antibodies) to various companies<br><i>Additional Information:</i>                                                      |                                       |                  |      |               |                                       |            |  |  |
| Patent - Patent - PTX3 as prognostic marker in Covid-19                                                                                                                                                       | -                                     | Self             |      |               |                                       |            |  |  |
| <i>Description:</i> Patent - PTX3 as prognostic marker in Covid-19<br><i>Patent Status:</i> Pending<br><i>Filing Jurisdiction:</i> ITA<br><i>Licensees:</i>                                                   |                                       |                  |      |               |                                       |            |  |  |
| <i>Patent Number:</i> european patent 201821816<br><i>Patent Holder:</i> Current Institution                                                                                                                  |                                       |                  |      |               |                                       |            |  |  |
| <table border="1"><thead><tr><th>Licensee</th><th>Title</th><th>Date</th></tr></thead><tbody><tr><td>DiaSorin Inc.</td><td>PTX3 as prognostic marker in Covid-19</td><td>11/06/2021</td></tr></tbody></table> | Licensee                              | Title            | Date | DiaSorin Inc. | PTX3 as prognostic marker in Covid-19 | 11/06/2021 |  |  |
| Licensee                                                                                                                                                                                                      | Title                                 | Date             |      |               |                                       |            |  |  |
| DiaSorin Inc.                                                                                                                                                                                                 | PTX3 as prognostic marker in Covid-19 | 11/06/2021       |      |               |                                       |            |  |  |
| <i>Additional Information:</i> Humanitas holds the IP , Cecilia Garlanda is one of the inventors and will get royalties if the assay is eventually approved                                                   |                                       |                  |      |               |                                       |            |  |  |

### Additional Questions

1. **Are there other relationships or activities that readers could perceive to have influenced, or that give the appearance of potentially influencing, what you wrote in the submitted work?**

No.

2. **What is the manuscript title?**

Humoral Innate Immunity and Acute Phase Proteins at the time of COVID-19

3. **Are you the corresponding author?**

No.

### Certification

I certify that the information provided in this disclosure is complete and accurate.



**Discloser Identifier:** 545595 **Disclosure Purpose:** Review - Humoral Innate Immunity and Acute Phase Proteins at the time of COVID-19

## Summary of Interests

### Company or Organization

| Entity                                                                                                                                                                                                                                                                                        | Type       | Interest Held By |
|-----------------------------------------------------------------------------------------------------------------------------------------------------------------------------------------------------------------------------------------------------------------------------------------------|------------|------------------|
| AbbVie Biotherapeutics                                                                                                                                                                                                                                                                        | Consultant | Self             |
| <p><i>Category:</i> Consultant<br/> <i>Description:</i> seminar<br/> <i>Additional Information:</i> Seminar and discussion related to immunotherapy and vaccines</p>                                                                                                                          |            |                  |
| AstraZeneca                                                                                                                                                                                                                                                                                   | Consultant | Self             |
| <p><i>Category:</i> Consultant<br/> <i>Description:</i> advisory boards<br/> <i>Additional Information:</i> in 2021 I participated in advisory boards related to vaccines at a national or international level</p>                                                                            |            |                  |
| Fondazione Internazionale Menarini                                                                                                                                                                                                                                                            | Consultant | Self             |
| <p><i>Category:</i> Consultant<br/> <i>Description:</i> seminar<br/> <i>Additional Information:</i></p>                                                                                                                                                                                       |            |                  |
| GlaxoSmithKline                                                                                                                                                                                                                                                                               | Consultant | Self             |
| <p><i>Category:</i> Consultant<br/> <i>Description:</i><br/> <i>Additional Information:</i></p>                                                                                                                                                                                               |            |                  |
| Humanitas University                                                                                                                                                                                                                                                                          | Employment | Self             |
| <p><i>Title:</i> Scientific Director<br/> <i>Additional Information:</i> Royalties related to the sale of reagents (monoclonal and polyclonal antibodies) to various companies to various companies in the years 2018-2020</p> <p style="text-align: right;"><i>Position Description:</i></p> |            |                  |
| Janssen Pharmaceuticals                                                                                                                                                                                                                                                                       | Consultant | Self             |
| <p><i>Category:</i> Consultant<br/> <i>Description:</i> 1/2 day<br/> <i>Additional Information:</i></p>                                                                                                                                                                                       |            |                  |
| PerkinElmer Inc                                                                                                                                                                                                                                                                               | Stock      | Self             |
| <p><i>Additional Information:</i> 2,200 shares from Biologend merger. Sold in 2021 and 2022</p>                                                                                                                                                                                               |            |                  |
| Pfizer                                                                                                                                                                                                                                                                                        | Consultant | Self             |

| Entity                                                                                                                   | Type | Interest Held By |
|--------------------------------------------------------------------------------------------------------------------------|------|------------------|
| <p><i>Category:</i> Consultant<br/> <i>Description:</i> lecture<br/> <i>Additional Information:</i> one day, lecture</p> |      |                  |

## Intellectual Property

| Type                                                                                                                                                                                                                                                                                                                                                                                                                                                                                                                                                                                                                                                                   | Is Licensed                           | Interest Held By |          |       |      |               |                                       |            |
|------------------------------------------------------------------------------------------------------------------------------------------------------------------------------------------------------------------------------------------------------------------------------------------------------------------------------------------------------------------------------------------------------------------------------------------------------------------------------------------------------------------------------------------------------------------------------------------------------------------------------------------------------------------------|---------------------------------------|------------------|----------|-------|------|---------------|---------------------------------------|------------|
| Patent - PTX3 as prognostic marker in Covid-19                                                                                                                                                                                                                                                                                                                                                                                                                                                                                                                                                                                                                         | -                                     | Self             |          |       |      |               |                                       |            |
| <p><i>Description:</i> PTX3 as prognostic marker in Covid-19<br/> <i>Patent Status:</i> Pending<br/> <i>Filing Jurisdiction:</i> ITA<br/> <i>Licensees:</i></p> <p><i>Patent Number:</i> european patent 201821816<br/> <i>Patent Holder:</i> Current Institution</p> <table border="1"> <thead> <tr> <th>Licensee</th> <th>Title</th> <th>Date</th> </tr> </thead> <tbody> <tr> <td>DiaSorin Inc.</td> <td>PTX3 as prognostic marker in Covid-19</td> <td>11/06/2021</td> </tr> </tbody> </table> <p><i>Additional Information:</i> Humanitas holds the IP , Alberto Mantovani is one of the inventors and will get royalties if the assay is eventually approved</p> |                                       |                  | Licensee | Title | Date | DiaSorin Inc. | PTX3 as prognostic marker in Covid-19 | 11/06/2021 |
| Licensee                                                                                                                                                                                                                                                                                                                                                                                                                                                                                                                                                                                                                                                               | Title                                 | Date             |          |       |      |               |                                       |            |
| DiaSorin Inc.                                                                                                                                                                                                                                                                                                                                                                                                                                                                                                                                                                                                                                                          | PTX3 as prognostic marker in Covid-19 | 11/06/2021       |          |       |      |               |                                       |            |

## Additional Questions

1. **Are there other relationships or activities that readers could perceive to have influenced, or that give the appearance of potentially influencing, what you wrote in the submitted work?**

No.

2. **What is the manuscript title?**

Humoral Innate Immunity and Acute Phase Proteins

3. **Are you the corresponding author?**

Yes.

- a. **Please list the other authors' names here.**

Cecilia Garlanda

## Certification

I certify that the information provided in this disclosure is complete and accurate.
